# Supplementary material
Source: PubMed Central journal article supplement (PMC2491358)
Supplement: JCI0833093sd.pdf [file JCI0833093sd.pdf]

### **Supplemental Figure 1**

Osteocytes positive for the CY3-labeled mouse chromosome probe. Photomicrographs of hematoxylin and eosin (H&E)-stained sections and fluorescence in situ hybridization (FISH) analysis with mouse Y chromosome paint probe (labeled with red CY3). Specimens processed for FISH analysis were obtained 15–30  $\mu\text{m}$  away from the H&E-stained section. The photomicrographs from the FISH analysis were taken with fluorescein isothiocyanate filters to show the tissue structure and were merged with photomicrographs of the same areas taken with a CY3 filter to show the red CY3-labeled mouse chromosome and with 4',6-diamidino-2-phenylindole to show the blue cell nuclei. The bright red dots, seen only in the osteocytes and osteoblasts, are CY3-labeled mouse chromosome probes. Original magnification, 630x. The arrow indicates an osteocytes positive for the CY3-labeled mouse chromosome probe (red dot) that is included in the area of detail. M, bone-like matrix; T, prostate cancer cells.

### **Supplemental Figure 2**

MDA PCa 118b-induced subcutaneous bone stained with alizarin red and alcian blue. MDA PCa 118b subcutaneous tumors harvested 1 to 4 weeks after cell injection stained positive for alizarin red, a bone-specific dye, but not for alcian blue, a marker for sulfated proteoglycans. Original magnification, 200x.

### **Supplemental Figure 3**

von Kossa-stained cross sections of bone (calvarial) organ culture left untreated or treated with 10 ng/ml of fibroblast growth factor 9 (FGF9). Each treatment condition included calvaria from three different mice. Original magnification, 1000x. Calvarial thickness area on the von Kossa-stained sections, as quantified by the OsteoMeasure system. \* $P < 0.01$  for untreated vs. FGF9-treated calvaria.

**Supplemental Table 1.** Genes expressed at different levels by cancer cells in the MDA PCa 118 variants vs the MDA PCa 2b and PC3 xenografts. Positive T scores indicate genes overexpressed by cancer cells in MDA PCa 118 variants

| Probe Set        | Gene Symbol | UniGene ID       | T score      | p Value            |
|------------------|-------------|------------------|--------------|--------------------|
| 203423_at        | RBP1        | Hs.101850        | 50.67        | 0.000000908        |
| 210221_at        | CHRNA3      | Hs.89605         | 39.62        | 0.000002425        |
| 206502_s_at      | INSM1       | Hs.89584         | 37.8         | 0.000002927        |
| <b>209540_at</b> | <b>IGF1</b> | <b>Hs.308053</b> | <b>33.27</b> | <b>0.000004868</b> |
| 209498_at        | CEACAM1     | Hs.512682        | 28.77        | 0.000008689        |
| 219756_s_at      | POF1B       | Hs.267038        | 27.27        | 0.000010755        |
| 204712_at        | WIF1        | Hs.284122        | 25.45        | 0.000014148        |
| <b>209541_at</b> | <b>IGF1</b> | <b>Hs.308053</b> | <b>25.26</b> | <b>0.000014578</b> |
| 204684_at        | NPTX1       | Hs.84154         | 24.15        | 0.000017434        |
| 218963_s_at      | KRT23       | Hs.9029          | 21.96        | 0.000025434        |
| 206606_at        | LIPC        | Hs.9994          | 21.43        | 0.000028038        |
| 203305_at        | F13A1       | Hs.80424         | 20.83        | 0.00003141         |
| 210121_at        | B3GALT2     | Hs.181353        | 20.62        | 0.000032696        |
| 219966_x_at      | BANP        | Hs.448828        | 20.42        | 0.000033974        |
| 206128_at        | ADRA2C      | Hs.123022        | 20.39        | 0.000034148        |
| 218687_s_at      | MUC13       | Hs.5940          | 20.38        | 0.000034229        |
| 220213_at        | C20orf17    | Hs.150825        | 19           | 0.000045161        |
| 212848_s_at      | C9orf3      | Hs.412286        | 18.95        | 0.000045653        |
| 220979_s_at      | SIAT7E      | Hs.226440        | 18.93        | 0.000045841        |
| 209390_at        | TSC1        | Hs.69429         | 18.87        | 0.000046415        |
| 220002_at        | FLJ10157    | Hs.125020        | 18.84        | 0.000046736        |
| 207035_at        | SLC30A3     | Hs.111967        | 18.78        | 0.000047308        |
| 201477_s_at      | RRM1        | Hs.383396        | 18.6         | 0.000049228        |
| 212023_s_at      | MKI67       | Hs.80976         | 17.24        | 0.000066381        |
| 208121_s_at      | PTPRO       | Hs.160871        | 17.19        | 0.000067162        |
| 203304_at        | BAMBI       | Hs.348802        | 16.71        | 0.000075164        |
| 207540_s_at      | SYK         | Hs.192182        | 16.55        | 0.000078124        |
| 210169_at        | KIAA0420    | Hs.512856        | 16.53        | 0.000078516        |
| 213172_at        | TTC9        | Hs.79170         | 16.47        | 0.000079508        |
| 218219_s_at      | LANCL2      | Hs.134342        | 16.37        | 0.000081455        |
| 218435_at        | DNAJD1      | Hs.438830        | 16.3         | 0.000082918        |
| 212021_s_at      | MKI67       | Hs.80976         | 16.11        | 0.000086852        |
| 204791_at        | NR2C1       | Hs.108301        | 16.05        | 0.000088138        |
| 209122_at        | ADFP        | Hs.3416          | 15.8         | 0.00009376         |
| <b>206404_at</b> | <b>FGF9</b> | <b>Hs.111</b>    | <b>15.36</b> | <b>0.000104883</b> |
| 214043_at        | PTPRD       | Hs.323079        | 15.21        | 0.000108992        |
| 219714_s_at      | CACNA2D3    | Hs.435112        | 14.95        | 0.000116734        |
| 205051_s_at      | KIT         | Hs.81665         | 14.95        | 0.00011675         |
| 212385_at        | TCF4        | Hs.359289        | 14.64        | 0.000126526        |
| 201887_at        | IL13RA1     | Hs.285115        | 14.27        | 0.000139957        |
| 202294_at        | STAG1       | Hs.138263        | 14.24        | 0.000141323        |
| 221100_at        | C6orf15     | Hs.272214        | 14.23        | 0.000141819        |
| 213348_at        | CDKN1C      | Hs.106070        | 14.17        | 0.000143859        |
| 222258_s_at      | SH3BP4      | Hs.17667         | 14           | 0.000151088        |
| 221841_s_at      | KLF4        | Hs.376206        | 14           | 0.000150824        |

|             |            |           |       |             |
|-------------|------------|-----------|-------|-------------|
| 201425_at   | ALDH2      | Hs.331141 | 13.84 | 0.000157918 |
| 217946_s_at | SAE1       | Hs.32748  | 13.73 | 0.000163097 |
| 40020_at    | CELSR3     | Hs.55173  | 13.72 | 0.000163492 |
| 221840_at   | PTPRE      | Hs.437980 | 13.66 | 0.000166505 |
| 219961_s_at | C20orf19   | Hs.436632 | 13.64 | 0.000167185 |
| 203961_at   | NEBL       | Hs.5025   | 13.61 | 0.000168765 |
| 202054_s_at | ALDH3A2    | Hs.440662 | 13.56 | 0.000171084 |
| 204576_s_at | KIAA0643   | Hs.155995 | 13.47 | 0.000175542 |
| 213596_at   | CASP4      | Hs.74122  | 13.35 | 0.000181788 |
| 206985_at   | HSD17B3    | Hs.477    | 13.24 | 0.000187922 |
| 201948_at   | HUMAUANTIG | Hs.75528  | 13.19 | 0.000190728 |
| 206114_at   | EPHA4      | Hs.244624 | 13.04 | 0.000199806 |
| 214284_s_at | FGF18      | Hs.87191  | 12.99 | 0.000202732 |
| 219142_at   | RASL11B    | Hs.8035   | 12.89 | 0.000209099 |
| 206191_at   | ENTPD3     | Hs.47042  | 12.88 | 0.00020922  |
| 217744_s_at | PERP       | Hs.149620 | 12.87 | 0.000210277 |
| 215164_at   | ---        | Hs.406753 | 12.81 | 0.0002139   |
| 204777_s_at | MAL        | Hs.80395  | 12.7  | 0.000221702 |
| 203999_at   | SYT1       | Hs.154679 | 12.61 | 0.000227642 |
| 201677_at   | DC12       | Hs.458320 | 12.6  | 0.00022843  |
| 207413_s_at | SCN5A      | Hs.169331 | 12.39 | 0.000243637 |
| 219305_x_at | FBXO2      | Hs.132753 | 12.25 | 0.000254706 |
| 205055_at   | ITGAE      | Hs.389133 | 12.17 | 0.000261835 |
| 219513_s_at | SH2D3A     | Hs.439645 | 12.09 | 0.000268535 |
| 201841_s_at | HSPB1      | Hs.76067  | 12.05 | 0.00027169  |
| 208216_at   | DLX4       | Hs.172648 | 12.05 | 0.000271899 |
| 214811_at   | KIAA0318   | Hs.225014 | 11.91 | 0.000284999 |
| 212295_s_at | SLC7A1     | Hs.14846  | 11.84 | 0.000291216 |
| 219229_at   | SLCO3A1    | Hs.113657 | 11.68 | 0.000307209 |
| 213082_s_at | SLC35D2    | Hs.386278 | 11.66 | 0.000309708 |
| 201756_at   | RPA2       | Hs.79411  | 11.63 | 0.000312623 |
| 213174_at   | TTC9       | Hs.79170  | 11.61 | 0.000314627 |
| 218319_at   | PELI1      | Hs.7886   | 11.47 | 0.000330309 |
| 213721_at   | SOX2       | Hs.816    | 11.46 | 0.000330844 |
| 205165_at   | CELSR3     | Hs.55173  | 11.41 | 0.000336193 |
| 203797_at   | VSNL1      | Hs.2288   | 11.39 | 0.000338851 |
| 219918_s_at | ASPM       | Hs.121028 | 11.2  | 0.000362102 |
| 204814_at   | CADPS      | Hs.441050 | 11.17 | 0.000365069 |
| 204105_s_at | NRCAM      | Hs.7912   | 11.09 | 0.000376112 |
| 218044_x_at | PTMS       | Hs.446525 | 11    | 0.000387652 |
| 221950_at   | EMX2       | Hs.202095 | 10.98 | 0.000391587 |
| 212290_at   | SLC7A1     | Hs.14846  | 10.85 | 0.00040998  |
| 218639_s_at | MGC11349   | Hs.288697 | 10.85 | 0.000409153 |
| 212943_at   | KIAA0528   | Hs.30656  | 10.82 | 0.000414111 |
| 212224_at   | ALDH1A1    | Hs.76392  | 10.8  | 0.000416773 |
| 213241_at   | PLXNC1     | Hs.286229 | 10.78 | 0.000419603 |
| 212538_at   | DOCK9      | Hs.362177 | 10.75 | 0.000424994 |
| 204141_at   | TUBB       | Hs.512712 | 10.72 | 0.000428505 |
| 203690_at   | TUBGCP3    | Hs.9884   | 10.71 | 0.000431001 |

|             |              |           |       |             |
|-------------|--------------|-----------|-------|-------------|
| 213317_at   | ---          | Hs.21103  | 10.7  | 0.000432027 |
| 217452_s_at | B3GALT2      | Hs.181353 | 10.7  | 0.000431788 |
| 207979_s_at | CD8B1        | Hs.405667 | 10.69 | 0.000433154 |
| 211518_s_at | BMP4         | Hs.68879  | 10.68 | 0.000435512 |
| 200608_s_at | RAD21        | Hs.81848  | 10.68 | 0.000436    |
| 212399_s_at | KIAA0121     | Hs.155584 | 10.63 | 0.000443841 |
| 200934_at   | DEK          | Hs.110713 | 10.61 | 0.000447146 |
| 204591_at   | CHL1         | Hs.388344 | 10.56 | 0.000455155 |
| 204975_at   | EMP2         | Hs.531561 | 10.52 | 0.000461274 |
| 209513_s_at | C9orf99      | Hs.388160 | 10.5  | 0.000465603 |
| 218370_s_at | FLJ12903     | Hs.369253 | 10.5  | 0.000465973 |
| 213826_s_at | ---          | Hs.477089 | 10.46 | 0.000472653 |
| 206158_s_at | ZNF9         | Hs.2110   | 10.46 | 0.000472644 |
| 213253_at   | SMC2L1       | Hs.119023 | 10.39 | 0.000484232 |
| 212505_s_at | KIAA0892     | Hs.112751 | 10.35 | 0.000491755 |
| 217143_s_at | TRD@         | Hs.2014   | 10.28 | 0.000505783 |
| 202080_s_at | OIP106       | Hs.457063 | 10.27 | 0.000506644 |
| 221677_s_at | DONSON       | Hs.17834  | 10.27 | 0.000507025 |
| 216204_at   | ARVCF        | Hs.326730 | 10.25 | 0.000510819 |
| 217885_at   | IPO9         | Hs.445587 | 10.21 | 0.000518571 |
| 214924_s_at | OIP106       | Hs.457063 | 10.17 | 0.000526946 |
| 212802_s_at | DKFZP434C212 | Hs.287266 | 10.14 | 0.000532351 |
| 213417_at   | TBX2         | Hs.168357 | 10.12 | 0.000537167 |
| 201301_s_at | ANXA4        | Hs.422986 | 10.03 | 0.000555692 |
| 208147_s_at | CYP2C8       | Hs.282871 | 9.97  | 0.000569125 |
| 219225_at   | PGBD5        | Hs.12247  | 9.95  | 0.000573739 |
| 202413_s_at | USP1         | Hs.35086  | 9.95  | 0.000571911 |
| 213547_at   | TIP120B      | Hs.154740 | 9.95  | 0.000573929 |
| 213054_at   | KIAA0841     | Hs.7426   | 9.93  | 0.000578563 |
| 204260_at   | CHGB         | Hs.2281   | 9.86  | 0.000593571 |
| 202869_at   | OAS1         | Hs.442936 | 9.84  | 0.000598289 |
| 208959_s_at | TXNDC4       | Hs.154023 | 9.83  | 0.000600281 |
| 206460_at   | SHREW1       | Hs.25924  | 9.81  | 0.000604757 |
| 219619_at   | DIRAS2       | Hs.165636 | 9.78  | 0.000612033 |
| 218287_s_at | EIF2C1       | Hs.309452 | 9.73  | 0.000623999 |
| 202510_s_at | TNFAIP2      | Hs.101382 | 9.73  | 0.000625412 |
| 221522_at   | ANKRD27      | Hs.59236  | 9.73  | 0.000625066 |
| 221536_s_at | FLJ11301     | Hs.436471 | 9.71  | 0.000629582 |
| 210892_s_at | GTF2I        | Hs.408507 | 9.7   | 0.000631683 |
| 215335_at   | ---          | Hs.406781 | 9.69  | 0.000635739 |
| 219882_at   | FLJ23033     | Hs.445826 | 9.66  | 0.000642237 |
| 209656_s_at | TM4SF10      | Hs.8769   | 9.66  | 0.000641289 |
| 204742_s_at | APRIN        | Hs.168625 | 9.66  | 0.000642285 |
| 201650_at   | KRT19        | Hs.309517 | 9.65  | 0.000645881 |
| 203086_at   | KIF2         | Hs.113319 | 9.63  | 0.000651361 |
| 208808_s_at | HMGB2        | Hs.434953 | 9.59  | 0.000661849 |
| 203145_at   | SPAG5        | Hs.16244  | 9.53  | 0.000676108 |
| 204798_at   | MYB          | Hs.407830 | 9.47  | 0.000694845 |
| 205539_at   | AVIL         | Hs.333257 | 9.44  | 0.000701107 |

|             |               |           |        |             |
|-------------|---------------|-----------|--------|-------------|
| 218876_at   | CGI-38        | Hs.412685 | 9.42   | 0.000707951 |
| 212621_at   | KIAA0286      | Hs.14912  | 9.38   | 0.000718272 |
| 213183_s_at | CDKN1C        | Hs.106070 | 9.35   | 0.000729    |
| 220408_x_at | P38IP         | Hs.435815 | 9.21   | 0.000771285 |
| 219404_at   | EPS8L3        | Hs.5366   | 9.18   | 0.000782791 |
| 218203_at   | ALG5          | Hs.339428 | 9.15   | 0.000790307 |
| 208854_s_at | STK24         | Hs.168913 | 9.11   | 0.00080671  |
| 206450_at   | DBH           | Hs.223858 | 9.1    | 0.000807111 |
| 212826_s_at | SLC25A6       | Hs.350927 | -9.1   | 0.000809501 |
| 218404_at   | SNX10         | Hs.418132 | -9.15  | 0.000792104 |
| 217099_s_at | GEMIN4        | Hs.302421 | -9.16  | 0.000788902 |
| 210976_s_at | PFKM          | Hs.75160  | -9.17  | 0.000786462 |
| 218665_at   | FZD4          | Hs.19545  | -9.17  | 0.000786478 |
| 218807_at   | VAV3          | Hs.267659 | -9.2   | 0.000774452 |
| 212333_at   | DKFZP564F0522 | Hs.23060  | -9.21  | 0.00077336  |
| 204040_at   | RNF144        | Hs.78894  | -9.29  | 0.000747368 |
| 212875_s_at | C21orf25      | Hs.16007  | -9.31  | 0.000739929 |
| 203622_s_at | LOC56902      | Hs.262858 | -9.31  | 0.00073971  |
| 201830_s_at | NET1          | Hs.25155  | -9.31  | 0.000740843 |
| 213713_s_at | LOC89944      | Hs.436178 | -9.32  | 0.000737439 |
| 208658_at   | ERP70         | Hs.93659  | -9.36  | 0.000724543 |
| 218771_at   | PANK4         | Hs.26156  | -9.37  | 0.000722259 |
| 218889_at   | C10orf117     | Hs.74899  | -9.37  | 0.00072272  |
| 202106_at   | GOLGA3        | Hs.4953   | -9.38  | 0.000719817 |
| 205074_at   | SLC22A5       | Hs.15813  | -9.39  | 0.000716823 |
| 213060_s_at | CHI3L2        | Hs.154138 | -9.39  | 0.000716087 |
| 204319_s_at | RGS10         | Hs.82280  | -9.44  | 0.000702032 |
| 210250_x_at | ADSL          | Hs.75527  | -9.49  | 0.00068885  |
| 216309_x_at | JRK           | Hs.142296 | -9.5   | 0.000684082 |
| 201444_s_at | ATP6AP2       | Hs.183434 | -9.66  | 0.000642095 |
| 201125_s_at | ITGB5         | Hs.149846 | -9.68  | 0.000636343 |
| 221687_s_at | C9orf28       | Hs.438972 | -9.78  | 0.000612171 |
| 210275_s_at | ZNF216        | Hs.406096 | -9.89  | 0.000585491 |
| 217843_s_at | VDRIP         | Hs.181112 | -9.91  | 0.000581757 |
| 218909_at   | RPS6KC1       | Hs.30352  | -9.95  | 0.000572452 |
| 203910_at   | PARG1         | Hs.430919 | -10.08 | 0.000543913 |
| 213793_s_at | HOMER1        | Hs.129051 | -10.14 | 0.000531967 |
| 203815_at   | GSTT1         | Hs.268573 | -10.15 | 0.000530392 |
| 206068_s_at | ACADL         | Hs.430108 | -10.2  | 0.000521088 |
| 219194_at   | SEMA4G        | Hs.444359 | -10.28 | 0.000505294 |
| 219201_s_at | TWSG1         | Hs.247302 | -10.36 | 0.000490658 |
| 210740_s_at | ITPK1         | Hs.408429 | -10.43 | 0.00047652  |
| 208814_at   | HSPA4         | Hs.90093  | -10.45 | 0.000474347 |
| 217236_x_at | IGHG1         | Hs.413826 | -10.45 | 0.000474116 |
| 219595_at   | ZNF26         | Hs.489608 | -10.51 | 0.000463663 |
| 219319_at   | HIF3A         | Hs.420830 | -10.51 | 0.000463124 |
| 217550_at   | ATF6          | Hs.433046 | -10.66 | 0.000438692 |
| 218589_at   | P2RY5         | Hs.123464 | -10.79 | 0.00041794  |
| 218526_s_at | RANGNRF       | Hs.408233 | -10.81 | 0.000414823 |

|             |          |           |        |             |
|-------------|----------|-----------|--------|-------------|
| 201517_at   | NCBP2    | Hs.240770 | -10.88 | 0.000404457 |
| 212912_at   | RPS6KA2  | Hs.301664 | -10.96 | 0.000393022 |
| 219347_at   | NUDT15   | Hs.144407 | -11.03 | 0.000384301 |
| 215096_s_at | ESD      | Hs.432491 | -11.12 | 0.00037153  |
| 218856_at   | TNFRSF21 | Hs.159651 | -11.14 | 0.000368995 |
| 218686_s_at | RHBDF1   | Hs.57988  | -11.14 | 0.00036973  |
| 220000_at   | SIGLEC5  | Hs.117005 | -11.19 | 0.000363181 |
| 215317_at   | ---      | Hs.185701 | -11.2  | 0.000361932 |
| 204432_at   | SOX12    | Hs.43627  | -11.24 | 0.000357285 |
| 205541_s_at | GSPT2    | Hs.59523  | -11.36 | 0.000342975 |
| 204129_at   | BCL9     | Hs.415209 | -11.47 | 0.000329525 |
| 200827_at   | PLOD     | Hs.75093  | -11.49 | 0.000327048 |
| 209061_at   | NCOA3    | Hs.382168 | -11.57 | 0.000318693 |
| 213129_s_at | GCSH     | Hs.513762 | -11.58 | 0.000317463 |
| 212507_at   | RW1      | Hs.318783 | -11.59 | 0.000316998 |
| 221359_at   | GDNF     | Hs.248114 | -11.61 | 0.000314461 |
| 203187_at   | DOCK1    | Hs.437620 | -11.74 | 0.000300884 |
| 203790_s_at | UK114    | Hs.18426  | -11.81 | 0.000293748 |
| 212658_at   | LHFPL2   | Hs.79299  | -11.85 | 0.00029034  |
| 218352_at   | RCBTB1   | Hs.58452  | -12.01 | 0.000275653 |
| 205677_s_at | DLEU1    | Hs.344524 | -12.07 | 0.000269976 |
| 202388_at   | RGS2     | Hs.78944  | -12.4  | 0.000243158 |
| 208782_at   | FSTL1    | Hs.433622 | -12.4  | 0.000243067 |
| 202956_at   | BIG1     | Hs.94631  | -12.48 | 0.000237306 |
| 212345_s_at | CREB3L2  | Hs.59943  | -12.57 | 0.00023085  |
| 212929_s_at | FLJ10824 | Hs.449662 | -12.95 | 0.000205392 |
| 204497_at   | ADCY9    | Hs.20196  | -13.13 | 0.000194135 |
| 207760_s_at | NCOR2    | Hs.287994 | -13.23 | 0.000188548 |
| 208886_at   | H1FO     | Hs.226117 | -13.36 | 0.000181289 |
| 221530_s_at | BHLHB3   | Hs.437282 | -13.47 | 0.000175561 |
| 209009_at   | ESD      | Hs.432491 | -13.49 | 0.000174818 |
| 201501_s_at | GRSF1    | Hs.309763 | -13.86 | 0.000156979 |
| 212737_at   | GM2A     | Hs.387156 | -13.93 | 0.000154196 |
| 218764_at   | PRKCH    | Hs.315366 | -13.99 | 0.000151244 |
| 209567_at   | RRS1     | Hs.71827  | -14.18 | 0.00014341  |
| 219335_at   | FLJ12969 | Hs.119699 | -14.34 | 0.000137372 |
| 202836_s_at | TXNL4    | Hs.433683 | -14.64 | 0.00012681  |
| 205751_at   | SH3GL2   | Hs.75149  | -15.05 | 0.000113573 |
| 204316_at   | RGS10    | Hs.82280  | -15.6  | 0.000098527 |
| 203421_at   | TP53I11  | Hs.433813 | -15.91 | 0.00009127  |
| 210879_s_at | GAF1     | Hs.24557  | -16.7  | 0.000075336 |
| 213122_at   | TSPYL5   | Hs.173094 | -16.72 | 0.000074889 |
| 203132_at   | RB1      | Hs.408528 | -17.97 | 0.00005637  |
| 201709_s_at | NIPSNAP1 | Hs.173878 | -18.38 | 0.000051537 |
| 201848_s_at | BNIP3    | Hs.79428  | -18.65 | 0.000048667 |
| 203789_s_at | SEMA3C   | Hs.171921 | -19.53 | 0.000040498 |
| 221816_s_at | PHF11    | Hs.308220 | -19.72 | 0.000039    |
| 201432_at   | CAT      | Hs.395771 | -20.02 | 0.00003674  |
| 202069_s_at | IDH3A    | Hs.250616 | -21.05 | 0.000030111 |

|             |          |           |        |             |
|-------------|----------|-----------|--------|-------------|
| 212539_at   | CHD1L    | Hs.429920 | -23.07 | 0.000020927 |
| 204686_at   | IRS1     | Hs.390242 | -24.17 | 0.000017394 |
| 212298_at   | NRP1     | Hs.173548 | -24.72 | 0.000015902 |
| 203188_at   | B3GNT6   | Hs.8526   | -26.31 | 0.000012394 |
| 218505_at   | FLJ12270 | Hs.413396 | -28.48 | 0.000009048 |
| 216470_x_at | PRSS3    | Hs.435699 | -35.4  | 0.0000038   |
| 208905_at   | CYCS     | Hs.437060 | -67.74 | 0.000000285 |

**Supplemental Table 2.** Sequences of primers used for polymerase chain reaction amplification of reverse-transcribed RNA (cDNA)

| <b>Gene (Product Size)</b> | <b>Primer Sequence</b>                                                                                      |
|----------------------------|-------------------------------------------------------------------------------------------------------------|
| BMP2 (197 bp)              | Sense: 5'-tcaagccaaacacaaacagc -3'<br>Anti-sense: 5'-acgtctgaacaatggcatga-3'                                |
| BMP4 (297 bp)              | Sense: 5'-cagcactggcttgagtatcctga -3'<br>Anti-sense: 5'-cgtgtccagtagtcgtgtgatga-3'                          |
| BMP6 (244 bp)              | Sense: 5'-ggaacgcctctgttcagttc-3'<br>Anti-sense: 5'-ccctgtagcctcacctcag-3'                                  |
| BMP7 (212 bp)              | Sense: 5'-cggatcagcgtttatcaggt-3'<br>Anti-sense: 5'-aactggggtgatgctctg-3'                                   |
| Wnt-1 (210 bp)             | Sense: 5'-cgacctcgtctacttcgagaaatcg-3'<br>Anti-sense: 5'-cagctgacgtggcagcaccagtg-3'                         |
| Wnt-3 (209 bp)             | Sense: 5'-ctgggccagcagtacacatctctg-3'<br>Anti-sense: 5'-gatggccaggctgtcatctatg-3'                           |
| Wnt-3a (220 bp)            | Sense: 5'-gcagctaccgatctggtggtc-3'<br>Anti-sense: 5'-gacggtggtgcagttcca-3'                                  |
| Wnt-4 (257 bp)             | Sense: 5'-gaggagacgtgagagaaactc-3'<br>Anti-sense: 5'-gtcactgcaaaggccacacctg-3'                              |
| Wnt-5a (367 bp)            | Sense: 5'-ccgagcgggagcgcacccacgc-3'<br>Anti-sense: 5'-ggtgctctcattgagcagcagtagtcaggg-3'                     |
| Wnt-7b (341 bp)            | Sense: 5'-cgtgttctctgctttggcg-3'<br>Anti-sense: 5'-tggctgcaggcagcggtgac-3'                                  |
| Wnt-8a (81 bp)             | Primers were purchased from SuperArray Bioscience Corp (Catalog No. PH02444A); sequences were not provided. |
| Wnt-10b (402 bp)           | Sense: 5'-gataccacaaccgcaattct-3'<br>Anti-sense: 5'-gcatgcagcttttctcta-3'                                   |
| DKK-1 (510 bp)             | Sense: 5'-caacgctatcaagaacctgc-3'<br>Anti-sense: 5'-gatcttgaccagaagtgc-3'                                   |
| PTHrP (242 bp)             | Sense: 5'- gttggagtagccggttgcta -3'<br>Anti-sense: 5'- tgcatcagatggtgaagga -3'                              |
| RANKL (158 bp)             | Sense: 5'- cagtgggagatgtagactcatg -3'<br>Anti-sense: 5'- gaaggggcacatgaccagggaaccaac -3'                    |



|                                       |             |                              |
|---------------------------------------|-------------|------------------------------|
| Osteoprotegerin (219 bp)              | Sense:      | 5'-aaccccagagcgaaatac-3'     |
|                                       | Anti-sense: | 5'-aagaatgcctcctcacac-3'     |
| Endothelin-1 (245 bp)                 | Sense:      | 5'-gagcacattggtgacagacct -3' |
|                                       | Anti-sense: | 5'-cccagatgaaagaagagacc-3'   |
| Fibroblast growth factor 9 (213 bp)   | Sense:      | 5'-cagtgccacgtgcttatatag-3'  |
|                                       | Anti-sense: | 5'-cacagccgattggcattctg-3'   |
| Insulin-like growth factor 1 (361 bp) | Sense:      | 5'-tgccacggctggaccggagacg-3' |
|                                       | Anti-sense: | 5'-gcatgtcactctcactcctc-3'   |

---

# Li et al. Supplemental Fig 1

## Mouse Probe

Hematoxylin and Eosin

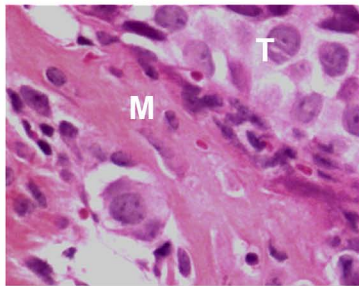

FISH

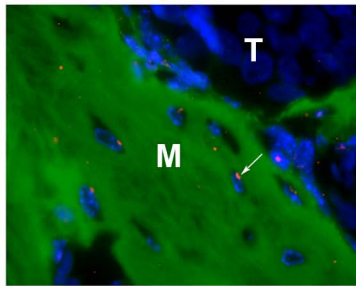

Detail

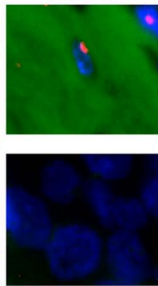

# Li et al. Supplemental Fig 2

1 week

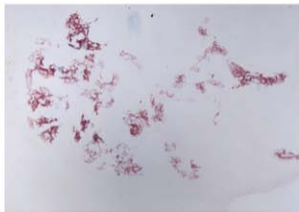

2 weeks

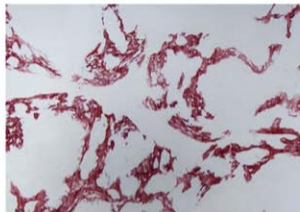

3 weeks

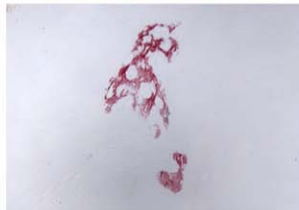

4 weeks

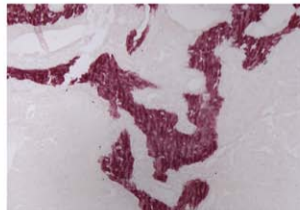

Positive Control  
(L5 growth plate)

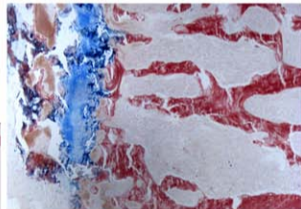

# Li et al. Supplemental Fig 3

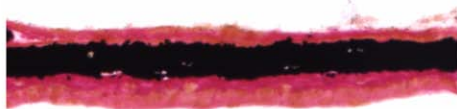

Untreated

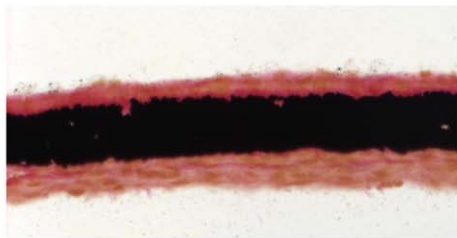

FGF9 10ng/ml

Calvaria Thickness

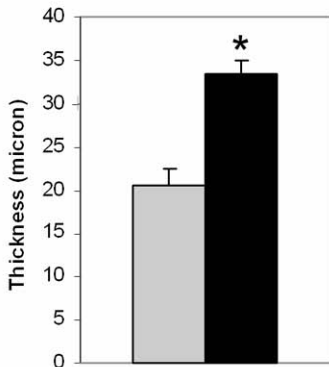

■ Untreated    ■ FGF9 10ng/ml
